# Supplementary material for: Textile-Based Body Capacitive Sensing for Knee Angle Monitoring
Source: MDPI journal article supplement (doi:10.3390/s23249657), 2023-12-06
Supplement: s1 [file s1]

## Supplementary Materials

### Definition of knee angles in the three anatomical planes.

For reference, we report below the definition of the knee angles in the three planes:

- knee flexion: angle between the long axis of the shank and the long axis of the thigh in the sagittal plane;
- knee ab/adduction: angle between the long axis of the thigh and the long axis of the shank in the frontal plane;
- knee rotation: angle between the long axis of the shank and the long axis of the thigh as observed in the transverse plane.

A more detailed description of the angles calculation from the optical motion capture system's manufacturer is available from the documentation (<https://docs.vicon.com/display/Nexus212/Plugin+Gait+kinematic+variables>).

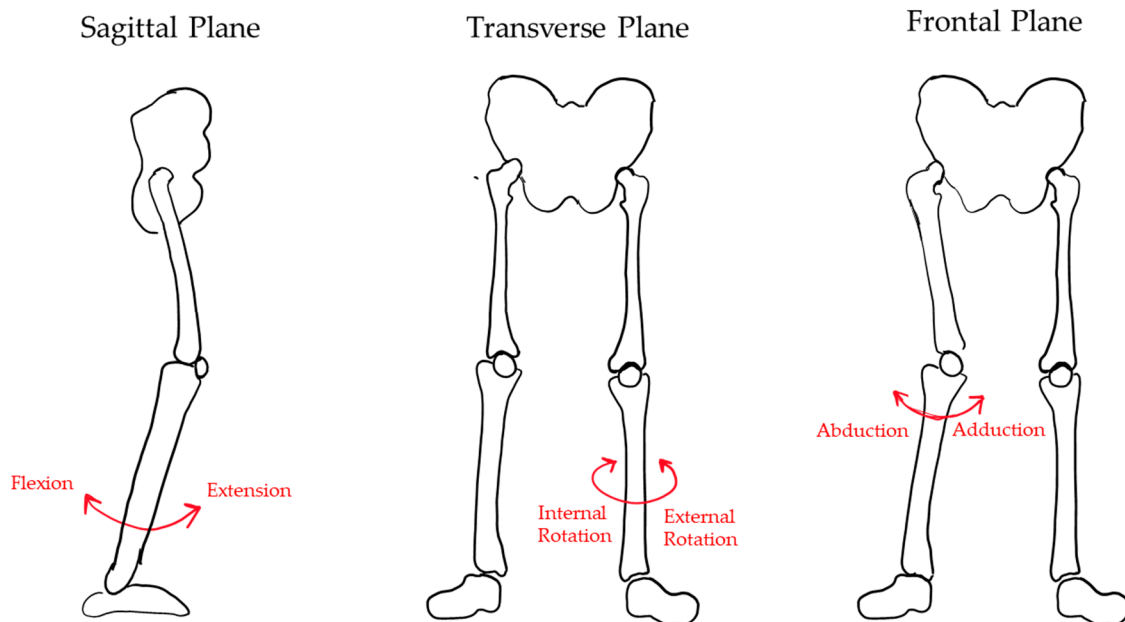

Figure S1: Schematic representation of the knee angles in the three anatomical planes.

Table S1: Regression metrics for all algorithms on single sensors tests.

| Model                    | Test     | Test | R2   | RMSE  | MAE   |
|--------------------------|----------|------|------|-------|-------|
| Decision Tree Regression | Flex/Ext | A    | 0.83 | 10.9  | 7.16  |
|                          |          | AP   | 0.67 | 15.17 | 7.9   |
|                          |          | L    | 0.26 | 21.83 | 15.6  |
|                          |          | M    | 0.74 | 13.85 | 10.38 |
|                          |          | ML   | 0.85 | 10.8  | 6.72  |
|                          |          | P    | 0.93 | 6.67  | 4.68  |
|                          | Squat    | A    | 0.91 | 9.15  | 6.01  |
|                          |          | AP   | 0.85 | 13.13 | 7.3   |
|                          |          | L    | 0.88 | 10.68 | 7.06  |

|                          |          |    |             |              |              |
|--------------------------|----------|----|-------------|--------------|--------------|
|                          |          | M  | 0.97        | 5.6          | 4.27         |
|                          |          | ML | 0.94        | 7.81         | 4.72         |
|                          |          | P  | 0.95        | 7.28         | 6.3          |
| Lasso Regression         | Flex/Ext | A  | 0.94        | 6.36         | 5.58         |
|                          |          | AP | 0.9         | 8.44         | 6.86         |
|                          |          | L  | 0.83        | 10.38        | 8.62         |
|                          |          | M  | 0.86        | 10.21        | 9.12         |
|                          |          | ML | 0.96        | 5.47         | 4.6          |
|                          |          | P  | 0.97        | 4.23         | 3.17         |
|                          | Squat    | A  | 0.97        | 4.85         | 3.59         |
|                          |          | AP | 0.97        | 6.1          | 5.01         |
|                          |          | L  | 0.94        | 7.23         | 5.46         |
|                          |          | M  | 0.98        | 5.06         | 4.04         |
|                          |          | ML | 0.93        | 8.41         | 6.71         |
|                          |          | P  | 0.89        | 11.16        | 8.99         |
| Linear Regression        | Flex/Ext | A  | 0.94        | 6.46         | 5.68         |
|                          |          | AP | 0.9         | 8.46         | 6.88         |
|                          |          | L  | 0.83        | 10.58        | 8.81         |
|                          |          | M  | 0.86        | 10.2         | 9.11         |
|                          |          | ML | 0.96        | 5.48         | 4.59         |
|                          |          | P  | 0.97        | 4.3          | 3.22         |
|                          | Squat    | A  | 0.98        | 4.7          | 3.42         |
|                          |          | AP | 0.97        | 6.12         | 5.02         |
|                          |          | L  | 0.96        | 6.39         | 4.94         |
|                          |          | M  | 0.98        | 5.03         | 4.03         |
|                          |          | ML | 0.93        | 8.46         | 6.73         |
|                          |          | P  | 0.98        | 4.91         | 3.82         |
| Random Forest Regression | Flex/Ext | A  | <b>0.83</b> | <b>10.79</b> | <b>6.93</b>  |
|                          |          | AP | <b>0.82</b> | <b>11.15</b> | <b>5.99</b>  |
|                          |          | L  | <b>0.77</b> | <b>12.19</b> | <b>9.89</b>  |
|                          |          | M  | <b>0.76</b> | <b>13.31</b> | <b>10.34</b> |
|                          |          | ML | <b>0.86</b> | <b>10.46</b> | <b>6.74</b>  |
|                          |          | P  | <b>0.95</b> | <b>5.48</b>  | <b>3.56</b>  |
|                          | Squat    | A  | <b>0.93</b> | <b>8.13</b>  | <b>4.9</b>   |
|                          |          | AP | <b>0.89</b> | <b>11.56</b> | <b>6.39</b>  |
|                          |          | L  | <b>0.93</b> | <b>8.28</b>  | <b>6.09</b>  |
|                          |          | M  | <b>0.99</b> | <b>4.15</b>  | <b>3.28</b>  |
|                          |          | ML | <b>0.94</b> | <b>8.19</b>  | <b>6.51</b>  |
|                          |          | P  | <b>0.95</b> | <b>7.59</b>  | <b>6.58</b>  |
| Ridge Regression         | Flex/Ext | A  | 0.94        | 6.26         | 5.47         |
|                          |          | AP | 0.9         | 8.31         | 6.7          |
|                          |          | L  | 0.86        | 9.63         | 7.9          |
|                          |          | M  | 0.86        | 10.22        | 9.13         |
|                          |          | ML | 0.96        | 5.52         | 4.66         |

|                                        |          |    |      |       |       |
|----------------------------------------|----------|----|------|-------|-------|
|                                        | Squat    | P  | 0.97 | 4.07  | 3.03  |
|                                        |          | A  | 0.98 | 4.73  | 3.46  |
|                                        |          | AP | 0.97 | 6.04  | 4.92  |
|                                        |          | L  | 0.95 | 6.52  | 4.96  |
|                                        |          | M  | 0.98 | 5.16  | 4.1   |
|                                        |          | ML | 0.93 | 8.43  | 6.72  |
|                                        |          | P  | 0.89 | 11.14 | 8.92  |
| Stochastic Gradient Descent Regression | Flex/Ext | A  | 0.95 | 5.89  | 5.09  |
|                                        |          | AP | 0.9  | 8.26  | 6.64  |
|                                        |          | L  | 0.95 | 5.67  | 4.54  |
|                                        |          | M  | 0.86 | 10.25 | 9.16  |
|                                        |          | ML | 0.94 | 6.59  | 5.21  |
|                                        |          | P  | 0.98 | 3.61  | 2.9   |
|                                        | Squat    | A  | 0.98 | 4.81  | 3.52  |
|                                        |          | AP | 0.97 | 6.08  | 4.9   |
|                                        |          | L  | 0.95 | 7.01  | 5.27  |
|                                        |          | M  | 0.98 | 5.21  | 4.15  |
|                                        |          | ML | 0.94 | 8.13  | 6.64  |
|                                        |          | P  | 0.97 | 5.89  | 3.96  |
| Support Vector Regression              | Flex/Ext | A  | 0.98 | 3.44  | 2.85  |
|                                        |          | AP | 0.98 | 3.86  | 3.08  |
|                                        |          | L  | 0.73 | 13.13 | 10.26 |
|                                        |          | M  | 0.92 | 7.53  | 6.74  |
|                                        |          | ML | 0.93 | 7.07  | 5.35  |
|                                        |          | P  | 0.96 | 5     | 3.58  |
|                                        | Squat    | A  | 0.99 | 2.39  | 1.65  |
|                                        |          | AP | 0.99 | 2.66  | 2.31  |
|                                        |          | L  | 0.94 | 7.41  | 4.92  |
|                                        |          | M  | 0.99 | 3.8   | 3.1   |
|                                        |          | ML | 0.99 | 2.6   | 2.02  |
|                                        |          | P  | 0.89 | 11.18 | 8.69  |
| XGBoost Regression                     | Flex/Ext | A  | 0.74 | 13.47 | 11.5  |
|                                        |          | AP | 0.71 | 14.3  | 10.4  |
|                                        |          | L  | 0.53 | 17.4  | 13.36 |
|                                        |          | M  | 0.75 | 13.6  | 11.14 |
|                                        |          | ML | 0.69 | 15.44 | 10.81 |
|                                        |          | P  | 0.67 | 14.05 | 12.52 |
|                                        | Squat    | A  | 0.9  | 9.63  | 6.43  |
|                                        |          | AP | 0.6  | 21.72 | 16.84 |
|                                        |          | L  | 0.86 | 11.27 | 9.79  |
|                                        |          | M  | 0.83 | 14.21 | 11.13 |
|                                        |          | ML | 0.7  | 18.18 | 14.47 |
|                                        |          | P  | 0.37 | 27.13 | 24.22 |

**Table S2: Regression metrics for all algorithms on combined sensors tests.**

| Model                       | Test     | Sensors       | R2   | RMSE  | MAE  |
|-----------------------------|----------|---------------|------|-------|------|
| Decision Tree Regression    | Flex/Ext | A + L + M + P | 0.88 | 7.79  | 2.96 |
|                             |          | AP + ML       | 0.89 | 7.93  | 4.71 |
|                             | Squat    | A + L + M + P | 0.84 | 12.31 | 8.8  |
|                             |          | AP + ML       | 0.96 | 5.78  | 3.34 |
| Lasso Regression            | Flex/Ext | A + L + M + P | 0.97 | 3.87  | 3.32 |
|                             |          | AP + ML       | 0.96 | 4.98  | 3.93 |
|                             | Squat    | A + L + M + P | 1    | 1.57  | 1.08 |
|                             |          | AP + ML       | 0.91 | 8.76  | 7.78 |
| Linear Regression           | Flex/Ext | A + L + M + P | 0.97 | 3.9   | 2.81 |
|                             |          | AP + ML       | 0.95 | 5.04  | 3.98 |
|                             | Squat    | A + L + M + P | 1    | 1.44  | 1.03 |
|                             |          | AP + ML       | 0.91 | 8.71  | 7.74 |
| Random Forest Regression    | Flex/Ext | A + L + M + P | 0.88 | 7.9   | 2.62 |
|                             |          | AP + ML       | 0.97 | 4.03  | 3.31 |
|                             | Squat    | A + L + M + P | 0.99 | 2.61  | 2.02 |
|                             |          | AP + ML       | 0.94 | 7.52  | 5.7  |
| Ridge Regression            | Flex/Ext | A + L + M + P | 0.97 | 3.72  | 2.93 |
|                             |          | AP + ML       | 0.95 | 5.15  | 4.07 |
|                             | Squat    | A + L + M + P | 1    | 1.36  | 1.01 |
|                             |          | AP + ML       | 0.91 | 8.69  | 7.81 |
| Stochastic Gradient Descent | Flex/Ext | A + L + M + P | 0.97 | 3.65  | 2.85 |
|                             |          | AP + ML       | 0.95 | 5.23  | 4.07 |
|                             | Squat    | A + L + M + P | 1    | 1.36  | 1.03 |
|                             |          | AP + ML       | 0.92 | 8.48  | 7.73 |
| Support Vector Regression   | Flex/Ext | A + L + M + P | 0.99 | 2.52  | 1.45 |
|                             |          | AP + ML       | 0.98 | 3.65  | 2.77 |
|                             | Squat    | A + L + M + P | 1    | 1.68  | 1.07 |
|                             |          | AP + ML       | 0.98 | 3.85  | 3.08 |
| XGBoost Regression          | Flex/Ext | A + L + M + P | 0.95 | 4.99  | 3.74 |
|                             |          | AP + ML       | 0.98 | 2.97  | 2.32 |

|  |       |                  |      |      |      |
|--|-------|------------------|------|------|------|
|  | Squat | A + L +<br>M + P | 0.97 | 5.01 | 3.59 |
|  |       | AP + ML          | 0.79 | 13.6 | 9.5  |
